# Supplementary material
Source: PubMed Central journal article supplement (PMC6363816)
Supplement: mmc1.pdf [file mmc1.pdf]

## Charge Reductions Associated With Shorter Time to Recovery in Septic Shock

*Wesley H. Self, MD, MPH; Dandan Liu, PhD; Nicholas Strayer, BS; Stephan Russ, MD, MPH; Michael J. Ward, MD, PhD; Nathan I. Shapiro, MD, MPH; Todd W. Rice, MD; and Matthew W. Semler, MD*

CHEST 2019; 155(2):315-321

*Online supplements are not copyedited prior to posting and the author(s) take full responsibility for the accuracy of all data.*

© 2018 AMERICAN COLLEGE OF CHEST PHYSICIANS. Reproduction of this article is prohibited without written permission from the American College of Chest Physicians. See online for more details. DOI: 10.1016/j.chest.2018.10.034

**e-Figure 1.** Trajectory plot of daily ICU charges by admission day stratified by quartile of ICU length of stay. The four lines in this figure are loess curves, with one line representing each of the 4 quartiles of patients in the study based on ICU length of stay. The range of ICU length of stay for each of the quartiles was: 1<sup>st</sup> quartile: 1-5 days; 2<sup>nd</sup> quartile: 6-8 days; 3<sup>rd</sup> quartile: 9-15 days; 4<sup>th</sup> quartile: 16-65 days. Daily charges decreased over time, with patients with shorter ICU length of stay (lower quartiles) experiencing faster reduction in daily charges than those with longer ICU lengths of stay.

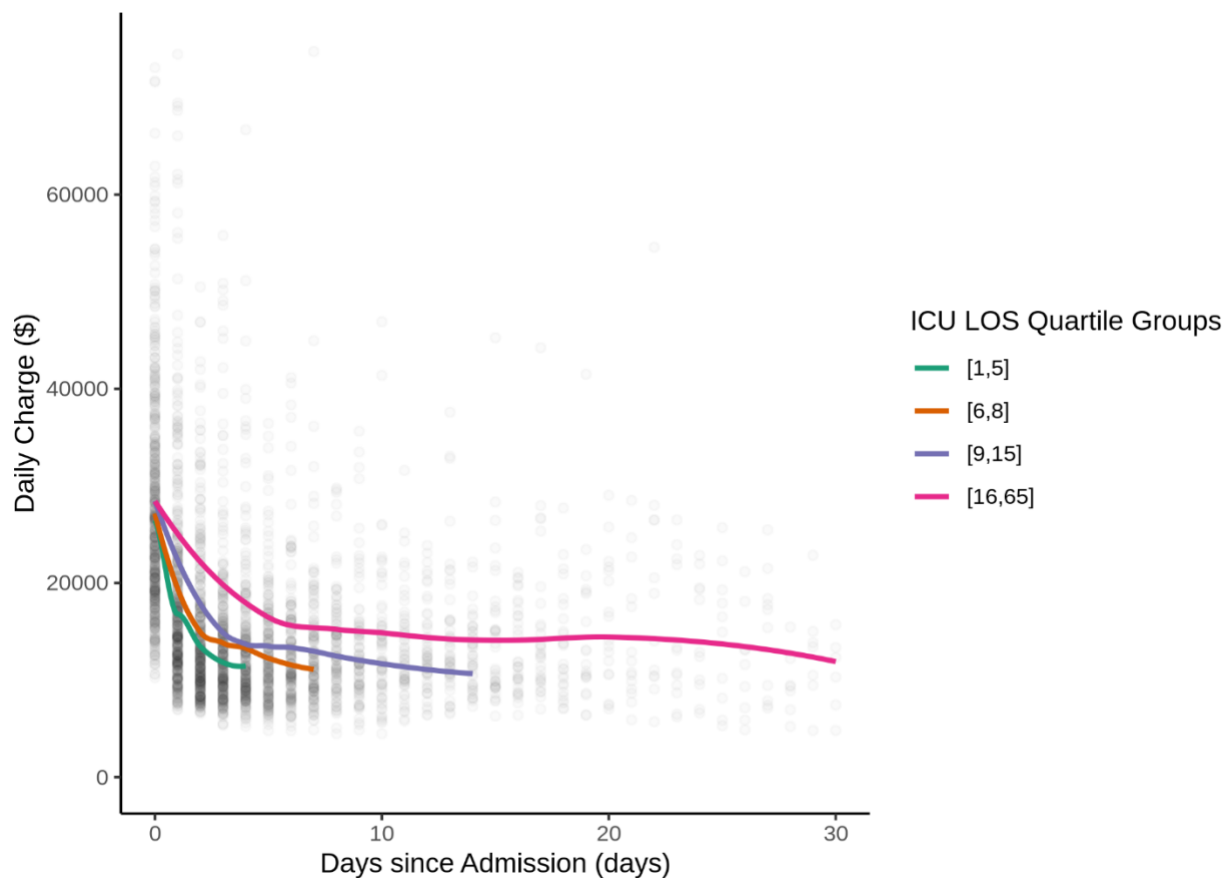

**e-Figure 2.** Trajectory plots of daily charges by admission day stratified by tertile of (A) duration of mechanical ventilation (1<sup>st</sup> tertile: 0 days; 2<sup>nd</sup> tertile: 1-2 days; 3<sup>rd</sup> tertile: 3-32 days), and (B) duration of vasopressor use (1<sup>st</sup> tertile: 0 days; 2<sup>nd</sup> tertile: 1-2 days; 3<sup>rd</sup> tertile: 3-23 days). Each line is a loess curve. Tertiles rather than quartiles were used due to highly right-skewed distribution. Changes in daily charges over time did not drastically differ by tertile of duration of mechanical ventilation or vasopressor use.

## (A) MECHANICAL VENTILATION

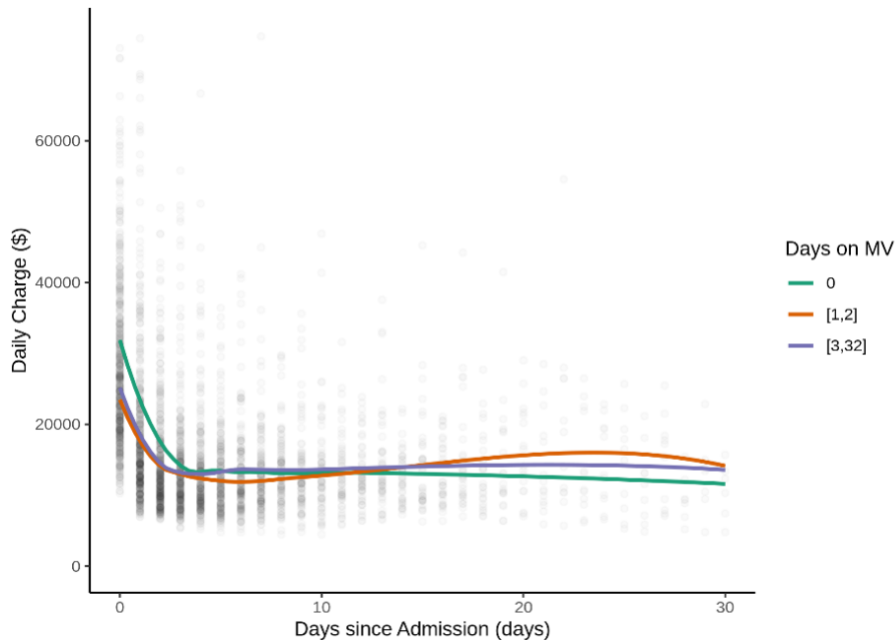

## (B) VASOPRESSOR USE

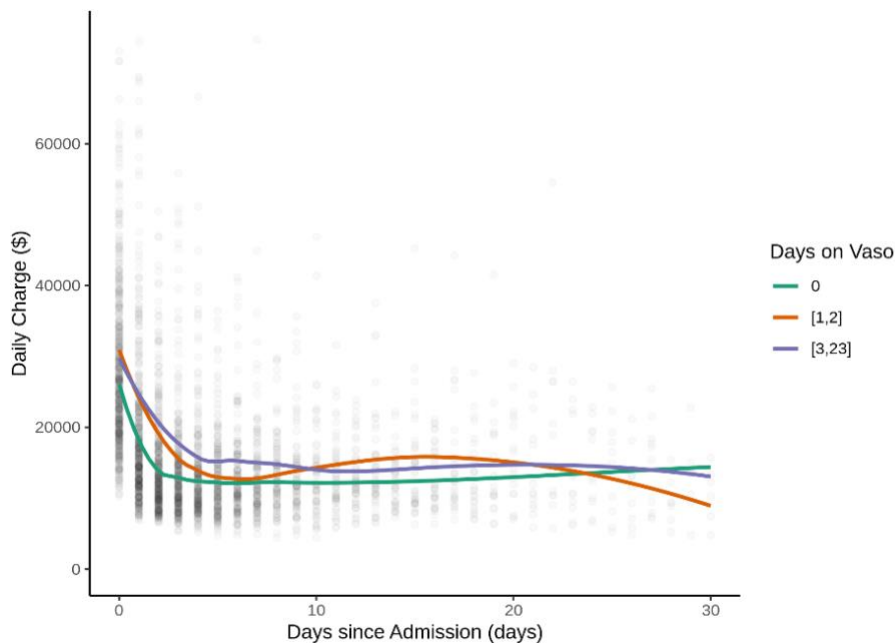

**e-Figure 3.** Patient location (ICU or floor) by hospital day.

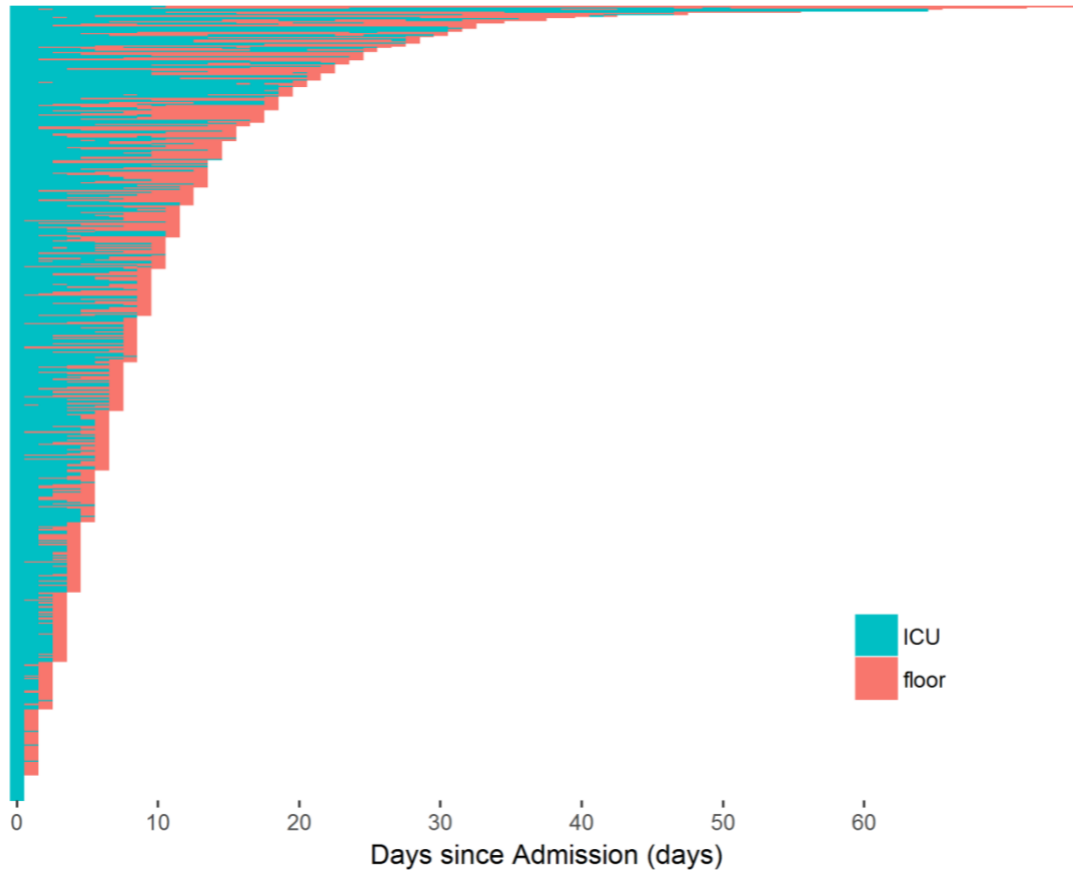

**e-Figure 4.** Histogram of total hospital charges for 587 hospitalizations for vasopressor-dependent septic shock.

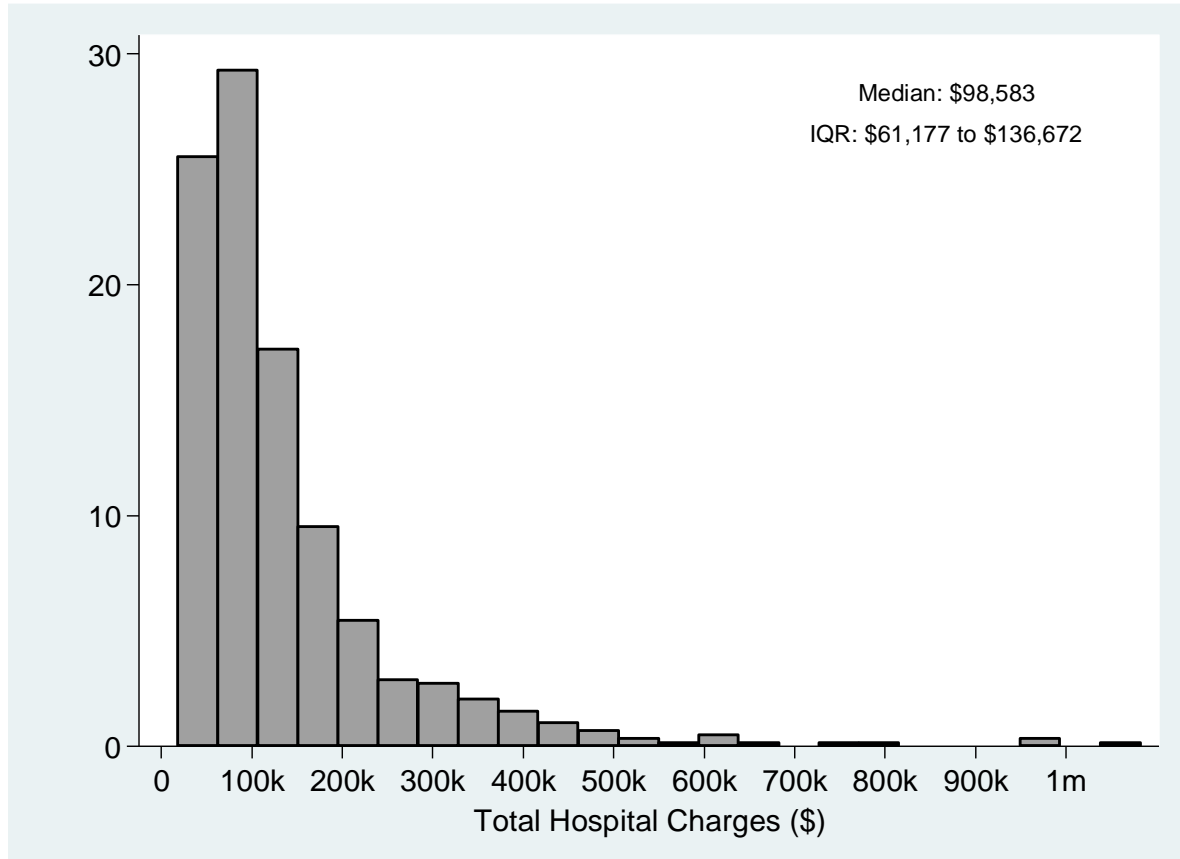

**e-Table 1.** Daily charges in the ICU by ICU day. These data are plotted in Figure 1.

| ICU Day # | Daily Charge (\$) |                             |                             |
|-----------|-------------------|-----------------------------|-----------------------------|
|           | Median            | 25 <sup>th</sup> percentile | 75 <sup>th</sup> percentile |
| 1         | 25074             | 19427                       | 32765                       |
| 2         | 15660             | 11947                       | 21511                       |
| 3         | 12601             | 9884                        | 17087                       |
| 4         | 12150             | 9436                        | 15599                       |
| 5         | 11531             | 9183                        | 14829                       |
| 6         | 11660             | 8830                        | 15613                       |
| 7         | 11451             | 9396                        | 15448                       |
| 8         | 11422             | 9159                        | 14919                       |
| 9         | 12397             | 9992                        | 15316                       |
| 10        | 11663             | 9382                        | 15061                       |
| 11        | 12006             | 9512                        | 15570                       |
| 12        | 9978              | 9978                        | 15757                       |
| 13        | 10552             | 10552                       | 15428                       |
| 14        | 10569             | 10569                       | 16118                       |
| 15        | 9473              | 9473                        | 14998                       |
| 16        | 9306              | 9306                        | 16962                       |
| 17        | 9754              | 9754                        | 16788                       |
| 18        | 10013             | 10014                       | 15693                       |
| 19        | 9442              | 9442                        | 16312                       |
| 20        | 10285             | 10285                       | 18995                       |

**e-Figure 5.** Histograms of daily charges for ICU days and hospital floor days.

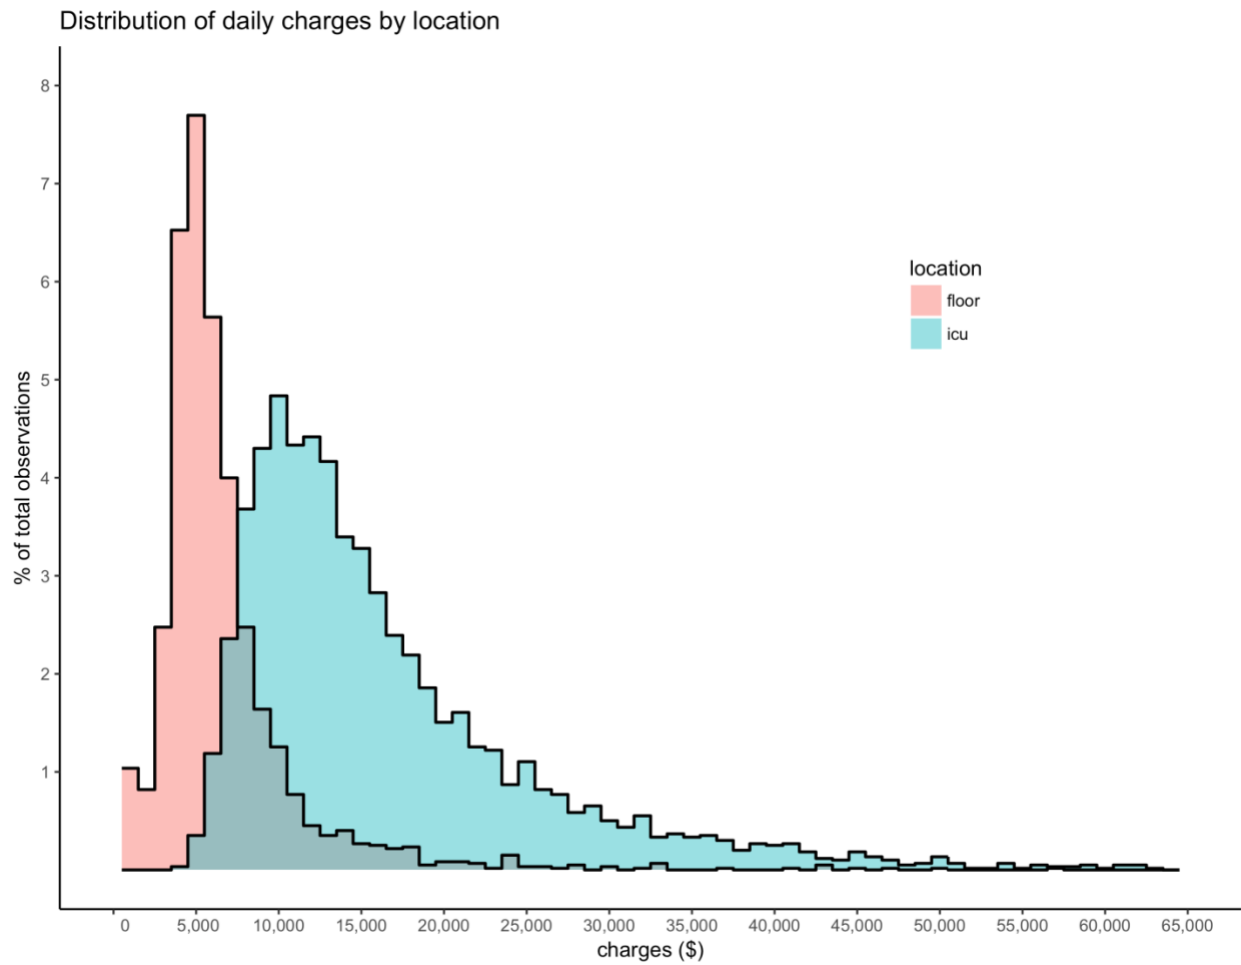

**e-Figure 6.** Correlation between total hospital charges and ICU length of stay. To improve clarity, the x-axis and y-axis were truncated at 30 days and \$800k, respectively.

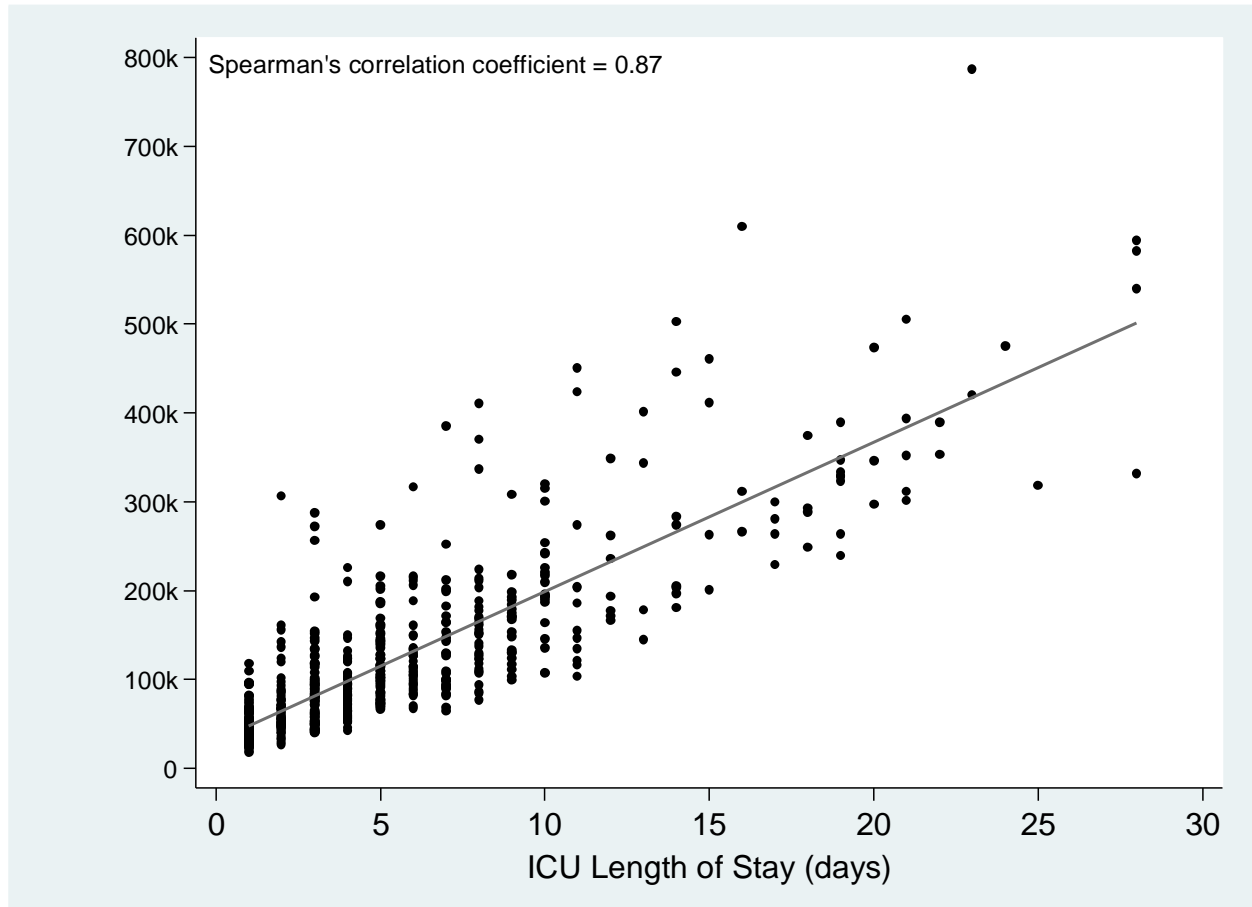



**e-Table 2.** Reductions in total hospital charges associated with a 1-day reduction in ICU length of stay, by ICU length of stay. These data are plotted in Figure 2. Total reductions were composed of reductions due to fewer days in the hospital and reductions due to lower daily charges.

| <b>Change in ICU Length of Stay</b> | <b>Charge reduction due to lower daily charges (\$)</b> | <b>Charge reduction due to fewer days in hospital (\$)</b> | <b>Total reduction in hospital charges (95% CI) (\$)</b> |
|-------------------------------------|---------------------------------------------------------|------------------------------------------------------------|----------------------------------------------------------|
| 2 days to 1 day                     | 19                                                      | 20012                                                      | 20030 (19300, 20761)                                     |
| 3 days to 2 days                    | 19                                                      | 18823                                                      | 18842 (18174, 19509)                                     |
| 4 days to 3 days                    | 57                                                      | 17671                                                      | 17728 (17093, 18363)                                     |
| 5 days to 4 days                    | 113                                                     | 16558                                                      | 16671 (16042, 17300)                                     |
| 6 days to 5 days                    | 188                                                     | 15482                                                      | 15670 (15023, 16317)                                     |
| 7 days to 6 days                    | 283                                                     | 14444                                                      | 14726 (14044, 15408)                                     |
| 8 days to 7 days                    | 396                                                     | 13443                                                      | 13839 (13110, 14567)                                     |
| 9 days to 8 days                    | 527                                                     | 12480                                                      | 13008 (12226, 13789)                                     |
| 10 days to 9 days                   | 678                                                     | 11555                                                      | 12233 (11396, 13070)                                     |
| 11 days to 10 days                  | 848                                                     | 10668                                                      | 11515 (10622, 12409)                                     |
| 12 days to 11 days                  | 1036                                                    | 9818                                                       | 10854 (9905, 11803)                                      |
| 13 days to 12 days                  | 1243                                                    | 9005                                                       | 10249 (9246, 11251)                                      |
| 14 days to 13 days                  | 1469                                                    | 8231                                                       | 9700 (8646, 10755)                                       |
| 15 days to 14 days                  | 1714                                                    | 7494                                                       | 9208 (8104, 10312)                                       |
| 16 days to 15 days                  | 1978                                                    | 6795                                                       | 8773 (7621, 9924)                                        |
| 17 days to 16 days                  | 2260                                                    | 6133                                                       | 8394 (7196, 9591)                                        |
| 18 days to 17 days                  | 2562                                                    | 5510                                                       | 8071 (6828, 9314)                                        |
| 19 days to 18 days                  | 2882                                                    | 4923                                                       | 7805 (6517, 9093)                                        |
| 20 days to 19 days                  | 3221                                                    | 4375                                                       | 7596 (6262, 8930)                                        |

**e-Figure 7.** Depiction of charge reduction associated with shortening ICU length of stay from 5 days to 4 days. The total charge reduction associated with shortening from 5 days to 4 days is \$16,671; this total is comprised of \$16,558 from 1 fewer day in the ICU and \$113 from lower charges daily during each of the days in the ICU (i.e., lower daily charges due to the patient not being as sick during the days he/she is in the ICU). On the plot below, the charge reduction associated with 1 fewer day in the ICU is represented by the y-intercept of the '5-line' at 4 days since admission (\$16,558). The charge reduction due to lower daily charges during the 4 days the patient was in the ICU is represented by the shaded area between the '5-line' and '4 (shifted)-line' (\$113).

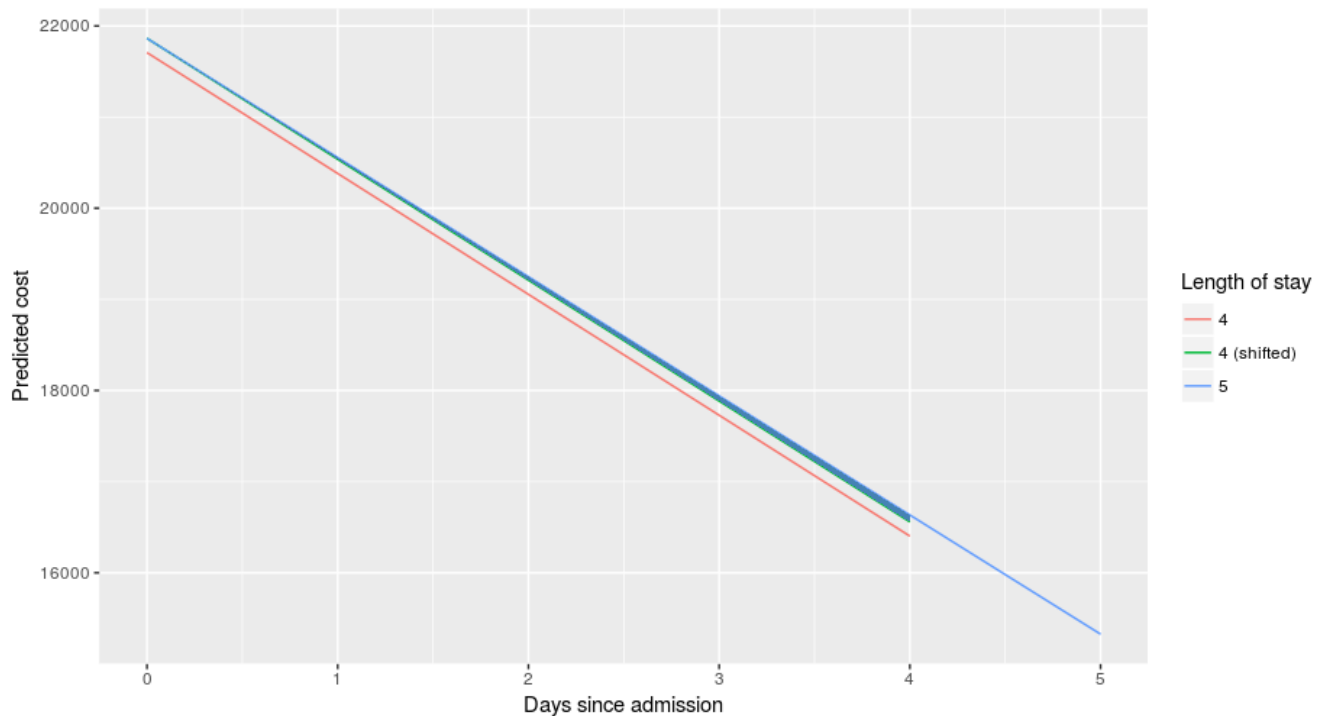

### e-Appendix 1: Supplemental Statistical Details

This section contains technical details on charge reduction calculations.

**ICU LOS:** Charge reduction associated with reducing one day of ICU length of stay was calculated from the following fitted daily charge model:

$$y(d|L) = 21073 - 1400 * d + 156 * L + 19 * d * L$$

where  $y(d|L)$  is the daily charge for day  $d$  of an ICU stay of  $L$  days. This model allows initial day charges and changes in daily charges dependent on ICU length of stay which is observed in the trajectory plot. The total charges for an ICU stay of  $L$  days is  $\sum_{d=1}^L y(d|L)$ . The total charges for an ICU stay of  $L - 1$  days is  $\sum_{d=1}^{L-1} y(d|L - 1)$ . Consequently, charge reduction due to one fewer day of ICU length of stay with  $L$  days is

$$\sum_{d=1}^L y(d|L) - \sum_{d=1}^{L-1} y(d|L - 1) = y(d|L) + \sum_{d=1}^{L-1} \{y(d|L) - y(d|L - 1)\},$$

which is comprised of two quantities, charge reduction due to one fewer day in ICU:  $y(d|L)$  and charge reduction due to lower daily charges in each day from day 1 to day  $L - 1$ :  $\sum_{d=1}^{L-1} \{y(d|L) - y(d|L - 1)\}$ .

**Mechanical Ventilation:** Charge reduction associated with reducing one day of mechanical ventilation use was calculated from the following fitted total hospital charge model:

$$\text{total hospital charges} = \beta_0 + \beta_1 * \text{days of MV use in ICU} +$$

$$\beta_2 * \text{ICU days without MV use in ICU} + \beta_3 * \text{days on hospital floor},$$

where  $\beta_1$  is the parameter of interest.

**Vasopressors:** Charge reduction associated with reducing one day of vasopressor use was calculated from the following fitted total hospital charge model:

$$\text{total hospital charges} = \beta_0 + \beta_1 * \text{days of Vs use in ICU} +$$

$$\beta_2 * \text{days without Vs use in ICU} + \beta_3 * \text{days on hospital floor},$$

where  $\beta_1$  is the parameter of interest.

#### Renal Replacement Therapy

$$\text{total hospital charges} = \beta_0 + \beta_1 * \text{use of rrt} + \beta_2 * \text{days in ICU} + \beta_3 * \text{days on hospital floor},$$

where  $\beta_1$  is the parameter of interest.
